# Supplementary material
Source: PubMed Central journal article supplement (PMC3745339)
Supplement: supp_M113.487884_jbc.M113.487884-1.pdf [file supp_M113.487884_jbc.M113.487884-1.pdf]

SUPPLEMENTAL TABLE 1

Primer pairs used for PCR amplification of fragments encoding human *PNPLA2* for construction of expression vectors

| Name of construct (N-end-His <sub>6</sub> /Xpress) | Primer orientation     | Primer sequence <sup>a</sup>                                                                                           | PEDF-R amino acids <sup>b</sup> | Molecular mass <sup>c</sup> |
|----------------------------------------------------|------------------------|------------------------------------------------------------------------------------------------------------------------|---------------------------------|-----------------------------|
| PEDF-R                                             | 11-F<br>12-R           | 5'-CACC <b>ATG</b> TTTCCCGCGAGAAGACG-3'<br>5'-CTACAGCCCCAGGGCCCCGATCACG-3'                                             | 1-504                           | 60,719                      |
| PEDF-RΔE5b                                         | Mutant 1S<br>Mutant 1A | 5' <b>TCCACCAACATC</b> <u>GTGCTGCGAGAGATGTGCAAGCAG</u> 3'<br>5' <b>CTCTCGCAGCAC</b> <u>GATGTTGGTGGAGCTGTCCTGCGG</u> 3' | 1-202, 233-504                  | 57,169                      |
| PEDF-R7                                            | 11-F<br>R351-R stop    | 5'-CACC <b>ATG</b> TTTCCCGCGAGAAGACG-3'<br>5'-CTAGCGGATGGTGAAGGACAGAGCG-3'                                             | 1-351                           | 43,866                      |
| PEDF-R6                                            | 11-F<br>E306-R stop    | 5'-CACC <b>ATG</b> TTTCCCGCGAGAAGACG-3'<br>5'-CTACTCATTGAGCCGGGCGGGCAGG-3'                                             | 1-306                           | 38,976                      |
| PEDF-R4                                            | 11-F<br>L232-R stop    | 5'-CACC <b>ATG</b> TTTCCCGCGAGAAGACG-3'<br>5'-CTACAGGGGATCCGGCGGAAGAGG-3'                                              | 1-232                           | 30,555                      |
| PEDFR4ΔE5b                                         | Mutant 2S<br>Mutant 2A | 5' <b>TCCACCAACATC</b> <u>TAGAAGGGTGGGCGCGCCGACCCAG</u> 3'<br>5' <b>CCCACCCCTCTAGATGTTGGTGGAGCTGTCCTGCGG</b> 3'        | 1-202                           | 27,005                      |
| L4                                                 | L4-F<br>L4-R           | 5'-CACC <b>ATG</b> GGGGGTGCGCTACGTGGATGGT-3'<br>5'-CTAGTTGGAGAGGGTGGT <b>CAGCAGG</b> T-3'                              | 159-325                         | 24,091                      |

<sup>a</sup>The italicized portion of the primer sequence is complementary to the overhang sequence used for directional cloning on PCR products in pENTR TOPO vectors. The underlined portion of the sequence anneals to the *PNPLA2* gene placed after a His<sub>6</sub>/Xpress at their N-terminus. Shown in boldface is the primer sequence that corresponds to the start and stop codons present in a PCR product prepared with that sequence.

<sup>b</sup>The number indicates the amino acid position of the sequence derived from the human *PNPLA2* cDNA in each construct.

<sup>c</sup>Predicted molecular masses of the derived fusion polypeptides determined using the DNA-protein translational tool from ExPASy.
